# Supplementary material for: Construction and Change Analysis of Water Ecosystem Service Flow Networks in the Xiangjiang River Basin (XRB)
Source: MDPI journal article supplement (doi:10.3390/su16093813), 2024-05-01

## Supplementary Tables

Table S1. Accuracy verification results of water yield data from 2000 to 2020. The relative error is the ratio of the absolute error to the observed value.

| Years           | 2000   | 2005    | 2010  | 2015    | 2020   | Average |
|-----------------|--------|---------|-------|---------|--------|---------|
| Observed value  | 771.8  | 748.8   | 794.4 | 827.1   | 664.8  | 761.38  |
| Simulated value | 714    | 632     | 818   | 741     | 740    | 729     |
| Relative error  | -7.49% | -15.60% | 2.97% | -10.41% | 11.31% | -4.25%  |

Table S2. Comparison results of annual water yield and water supply in the Xiangjiang River Basin from 2000 to 2020 and the proportion of ecological base flow.

| Years              | 2000                  | 2005                  | 2010                  | 2015                  | 2020                  |
|--------------------|-----------------------|-----------------------|-----------------------|-----------------------|-----------------------|
| Y(m <sup>3</sup> ) | $7.14 \times 10^{10}$ | $6.32 \times 10^{10}$ | $8.18 \times 10^{10}$ | $7.41 \times 10^{10}$ | $7.40 \times 10^{10}$ |
| S(m <sup>3</sup> ) | $5.15 \times 10^{10}$ | $4.56 \times 10^{10}$ | $5.89 \times 10^{10}$ | $5.34 \times 10^{10}$ | $5.34 \times 10^{10}$ |
| (Y-S)/Y×100%       | 27.9%                 | 27.8%                 | 28.0%                 | 27.9%                 | 27.8%                 |

Table S3. In-degree, out-degree, and degree data, as well as the weights of each node in the ecosystem service flow network of the Xiangjiang River Basin from 2000 to 2020.

| node | ID | OD | De | Weight( $10^8\text{m}^3$ ) |        |        |        |        |
|------|----|----|----|----------------------------|--------|--------|--------|--------|
|      |    |    |    | 2000                       | 2005   | 2010   | 2015   | 2020   |
| 1    | 0  | 1  | 1  | 7.006                      | 5.391  | 8.185  | 7.377  | 10.079 |
| 2    | 1  | 1  | 2  | 8.445                      | 7.343  | 10.558 | 8.921  | 10.696 |
| 3    | 0  | 1  | 1  | 4.677                      | 4.310  | 6.451  | 4.821  | 4.626  |
| 4    | 0  | 1  | 1  | 11.159                     | 9.665  | 16.629 | 11.792 | 15.481 |
| 5    | 3  | 1  | 4  | -6.109                     | -7.479 | -3.934 | -7.026 | -3.681 |
| 6    | 2  | 1  | 3  | -2.557                     | -3.869 | -1.849 | -2.773 | -2.588 |
| 7    | 2  | 1  | 3  | 0.842                      | 0.350  | 2.070  | 0.808  | 0.721  |
| 8    | 2  | 1  | 3  | 1.420                      | 1.011  | 1.532  | 1.240  | 1.145  |
| 9    | 2  | 1  | 3  | 5.428                      | 3.749  | 6.466  | 4.827  | 4.801  |
| 10   | 0  | 1  | 1  | 7.693                      | 6.185  | 8.238  | 7.165  | 6.380  |
| 11   | 0  | 1  | 1  | 6.334                      | 4.353  | 6.000  | 5.596  | 5.454  |
| 12   | 2  | 1  | 3  | 8.790                      | 6.256  | 8.586  | 7.746  | 7.090  |
| 13   | 3  | 1  | 4  | 5.507                      | 3.467  | 3.975  | 4.597  | 4.071  |
| 14   | 2  | 1  | 3  | 2.424                      | 1.547  | 2.381  | 2.136  | 1.893  |
| 15   | 2  | 1  | 3  | 3.597                      | 2.455  | 3.235  | 3.058  | 2.665  |
| 16   | 0  | 1  | 1  | 4.098                      | 2.595  | 3.465  | 4.164  | 4.509  |
| 17   | 2  | 1  | 3  | 0.768                      | -0.273 | 0.794  | 0.335  | 0.085  |
| 18   | 0  | 1  | 1  | 5.908                      | 3.606  | 4.268  | 5.408  | 5.644  |
| 19   | 2  | 1  | 3  | 2.342                      | 1.506  | 1.953  | 1.971  | 1.810  |
| 20   | 2  | 1  | 3  | 0.798                      | 0.548  | 0.707  | 0.802  | 0.829  |
| 21   | 0  | 1  | 1  | 4.101                      | 2.616  | 3.289  | 3.640  | 3.441  |
| 22   | 2  | 1  | 3  | 2.905                      | 1.990  | 2.274  | 3.038  | 3.277  |
| 23   | 2  | 1  | 3  | 0.624                      | 0.285  | 0.695  | 0.756  | 0.858  |
| 24   | 2  | 1  | 3  | 6.362                      | 4.001  | 4.987  | 5.679  | 5.508  |
| 25   | 2  | 1  | 3  | 11.896                     | 7.388  | 10.011 | 9.534  | 8.263  |
| 26   | 0  | 1  | 1  | 13.270                     | 10.004 | 12.449 | 11.529 | 11.089 |
| 27   | 0  | 1  | 1  | 25.944                     | 20.345 | 24.628 | 23.013 | 21.083 |
| 28   | 0  | 1  | 1  | 8.926                      | 6.592  | 7.953  | 8.830  | 9.030  |
| 29   | 3  | 1  | 4  | 11.850                     | 8.448  | 10.370 | 12.026 | 12.178 |
| 30   | 0  | 1  | 1  | 6.912                      | 5.163  | 6.599  | 6.736  | 6.891  |
| 31   | 0  | 1  | 1  | 6.040                      | 3.693  | 5.125  | 4.555  | 5.166  |
| 32   | 0  | 1  | 1  | 35.565                     | 27.674 | 33.360 | 30.202 | 31.660 |
| 33   | 2  | 1  | 3  | 13.710                     | 9.663  | 12.381 | 12.092 | 12.182 |
| 34   | 0  | 1  | 1  | 12.062                     | 9.953  | 11.983 | 12.917 | 13.201 |
| 35   | 0  | 1  | 1  | 15.739                     | 10.690 | 12.622 | 17.832 | 18.860 |
| 36   | 0  | 1  | 1  | 13.014                     | 9.819  | 11.433 | 14.774 | 15.173 |
| 37   | 0  | 1  | 1  | 7.258                      | 6.108  | 7.163  | 7.227  | 7.697  |
| 38   | 0  | 1  | 1  | 12.165                     | 10.082 | 11.318 | 13.791 | 13.983 |
| 39   | 0  | 1  | 1  | 21.169                     | 22.047 | 23.027 | 24.230 | 25.405 |
| 40   | 3  | 0  | 3  | 1.851                      | 1.224  | 2.308  | 1.825  | 3.055  |
| 41   | 0  | 1  | 1  | 11.608                     | 7.703  | 9.915  | 11.137 | 14.058 |
| 42   | 0  | 1  | 1  | 12.119                     | 6.976  | 9.673  | 10.007 | 9.680  |

|    |   |   |   |        |        |        |        |        |
|----|---|---|---|--------|--------|--------|--------|--------|
| 43 | 0 | 1 | 1 | 6.380  | 4.187  | 4.937  | 5.751  | 6.983  |
| 44 | 0 | 1 | 1 | 3.835  | 3.722  | 5.605  | 4.070  | 3.226  |
| 45 | 0 | 1 | 1 | 6.679  | 5.287  | 6.323  | 6.001  | 5.323  |
| 46 | 2 | 1 | 3 | 16.241 | 10.317 | 12.906 | 17.165 | 18.235 |

---

Supplementary Figures

Figure S1. Changes in freshwater supply and precipitation in the Xiangjiang River Basin from 2000 to 2020

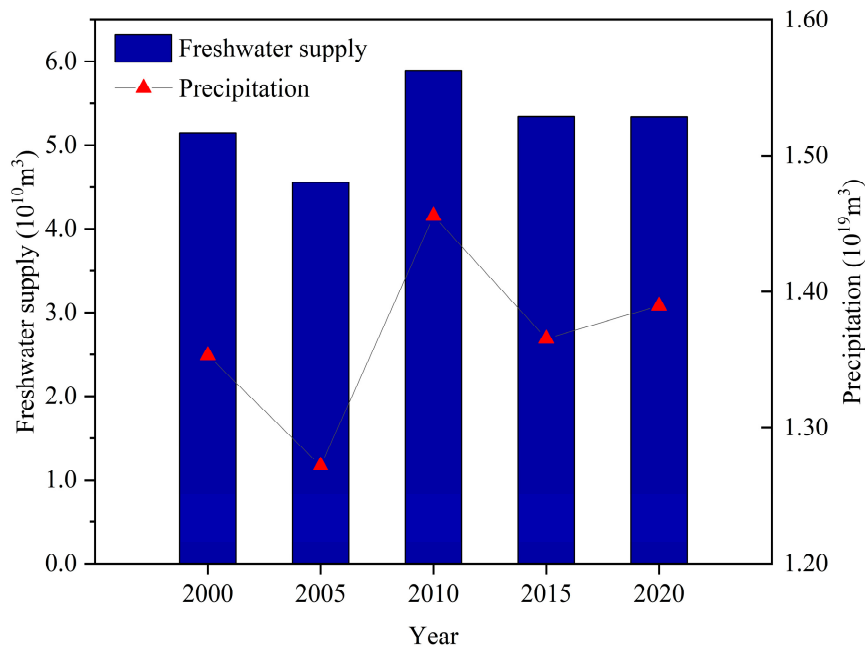

Figure S2 Changes in freshwater demand in the Xiangjiang River Basin from 2000 to 2020.

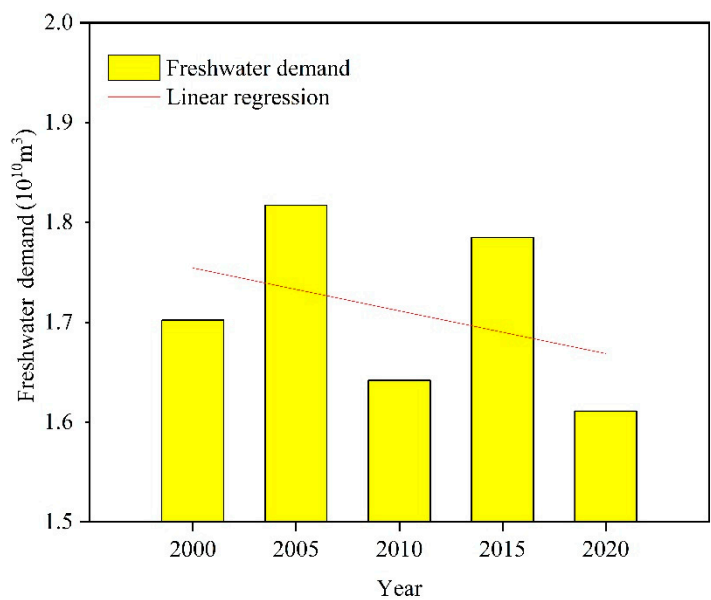

Figure S3 Changes in the number of sub-basins with different SDs in the Xiangjiang River Basin.

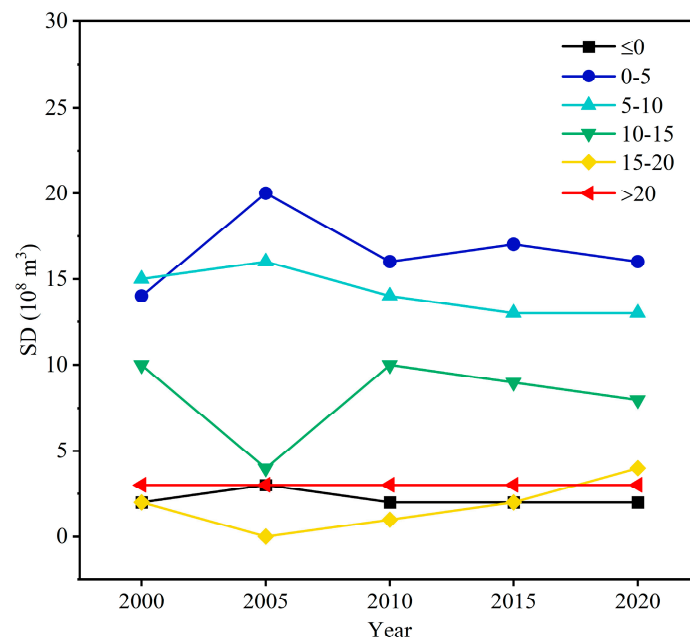

Supplement: s1 [file s1]
